# Supplementary material for: Development of Intracorporeal Differentiation of Stem Cells to Induce One-Step Mastoid Bone Reconstruction during Otitis Media Surgeries
Source: MDPI journal article supplement (doi:10.3390/polym14050877), 2022-02-23
Supplement: s1 [file s1]

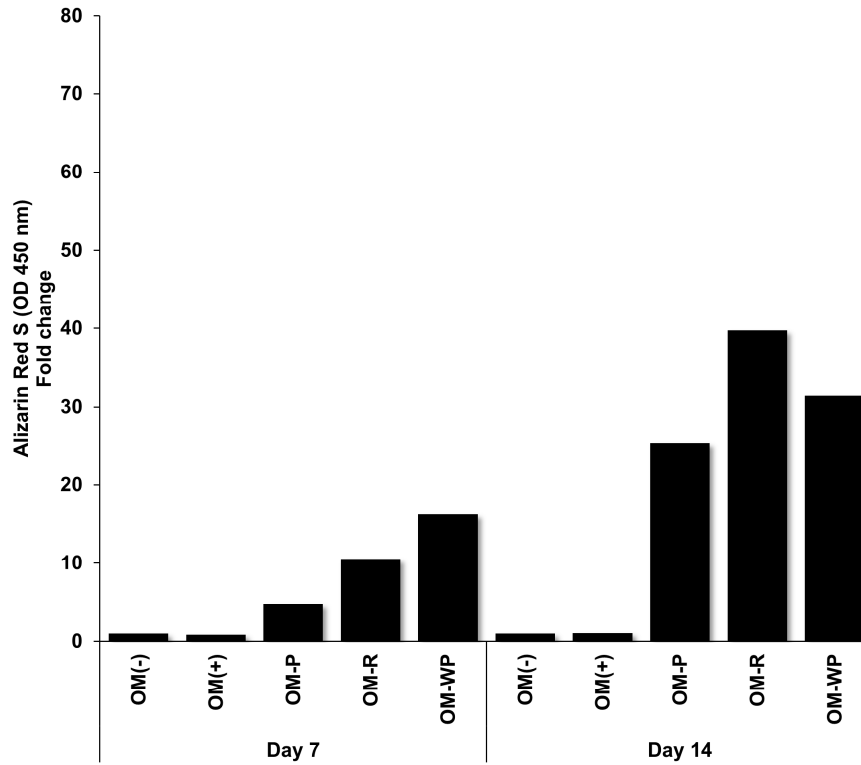

**Figure S1.** The quantitative results of retention of Alizarin Red S corresponding the previous phenotypic data. Osteogenic media (OM) (-): Low glucose (1g/L) DMEM, 1% penicillin/streptomycin with Dexamethasone (0.1  $\mu$ M final), L-Ascorbic acid 2-phosphate (50.0  $\mu$ M final) and  $\beta$ -glycerophosphate (10.0 mM final). OM (+): OM with 10 % FBS, OM-P: OM with 10 % Platelet poor plasma, OM-R: OM with 10 % Platelet rich plasma, OM-WP: OM with 10 % Whole plasma.
